# Supplementary material
Source: MDPI journal article supplement (https://www.mdpi.com/2073-4344/8/8/320)

# Supplementary Material: Investigation of Earth-Abundant Oxygen Reduction Electrocatalysts for the Cathode of Passive

Francisca E.R. Oliveira, Nelson A. Galiote and Fabio H.B. Lima \*

Institute of Chemistry of Sao Carlos, University of Sao Paulo, Av. Trabalhador Saocarlene, 400 CP 780, São Carlos SP, 13566-590, Brazil; elenicequimica@gmail.com (F.E.R.O.); nags13@gmail.com (N.A.G.)

\* Correspondence: fabiohbl@iqsc.usp.br; Tel.: +55-16-3373-8681

Received: 30 June 2018; Accepted: 29 July 2018; Published: date

## Figures

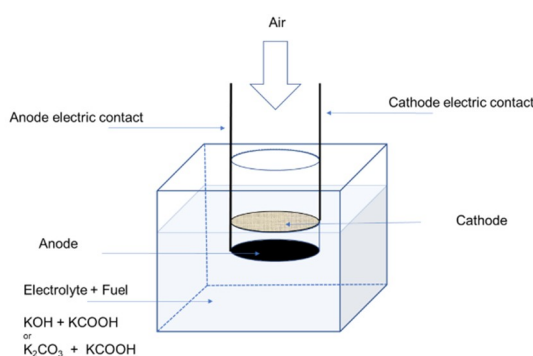

**Figure S1.** Schematics of the Passive Air-breathing Direct Formate Fuel Cell utilized for testing the electrocatalytic activity and stability of the synthesized FeCo-N-C electrocatalyst. The anode is entirely immersed in the anolyte, and the fuel is transported to the electrode surface *via* natural diffusion. The cathode is opened to the air using a gas diffusion electrode.

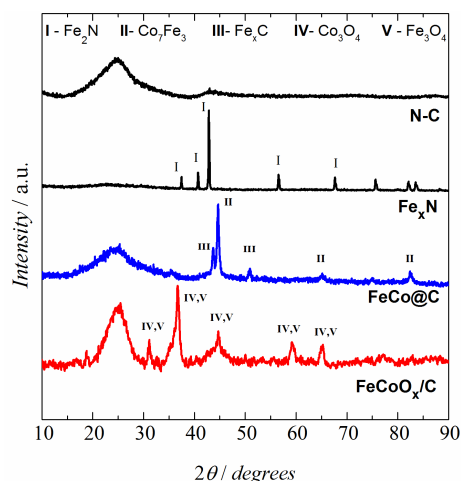

**Figure S2.** X-ray diffractograms obtained for the synthesized materials utilized as “blanks”: FeCoO<sub>x</sub>/C, FeCo@C, Fe<sub>x</sub>N, N-C. The attribution of each peak is included in the figure inset.

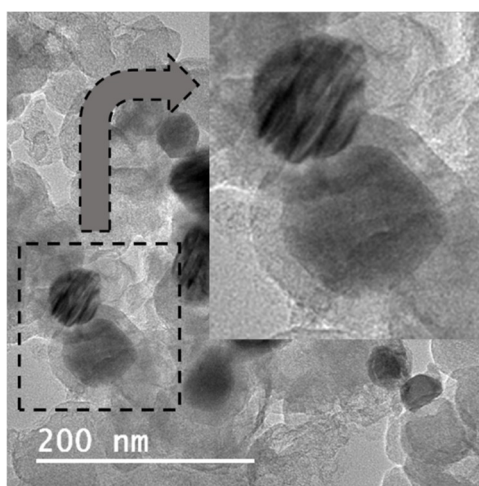

**Figure S3.** Transmission Electron Microscopy image of the carbon-encapsulated iron-cobalt nanoparticle, FeCo@C, prepared *via* thermal treatment at 1050 °C in Ar atmosphere. The inset shows the graphite carbon layer that entirely encapsulates the metallic nanoparticle.

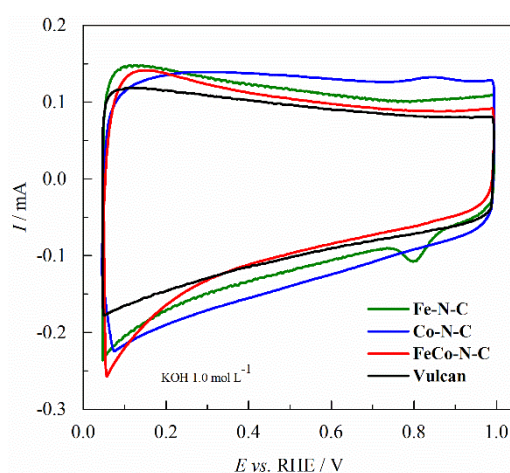

**Figure S4.** Cyclic voltammograms for Fe-N-C, Co-N-C, and FeCo-N-C electrocatalysts obtained in Ar-saturated 1.0 mol L<sup>-1</sup> KOH electrolyte. The voltammogram for Vulcan was included for comparison. Scan rate: 50 mV s<sup>-1</sup>.

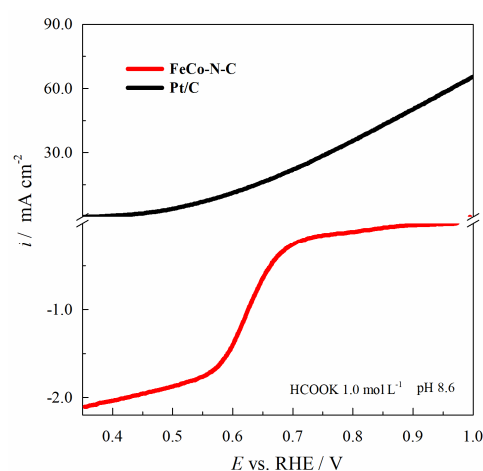

**Figure S5.** Polarization curves for the ORR on FeCo-N-C and Pt/C in O<sub>2</sub>-saturated 1.0 mol L<sup>-1</sup> HCOOK electrolyte. The curves show the selectivity for the ORR (or tolerance to the presence of formate) of the Fe-Co-N-C electrocatalyst, and the poor selectivity of Pt/C. Scan rate: 5.0 mVs<sup>-1</sup>. Rotation rate: 1600 rpm.

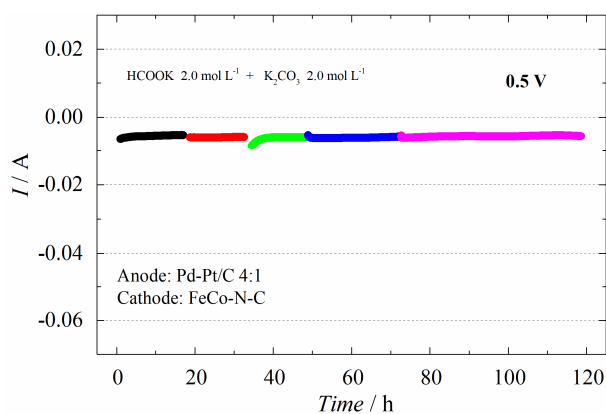

**Figure S6.** Durability test obtained in the passive air-breathing direct formate fuel cell conducted *via* potentiostatic measurements at 0.5 V in 2.0 mol L<sup>-1</sup> KCOOH + 2.0 mol L<sup>-1</sup> K<sub>2</sub>CO<sub>3</sub> electrolyte, during 120 h. Cathode: FeCo-N-C; Anode: PdPt/C 4:1. The measurement was recorded at 25°C.

© 2018 by the authors. Submitted for possible open access publication under the terms and conditions of the Creative Commons Attribution (CC BY) license (<http://creativecommons.org/licenses/by/4.0/>).

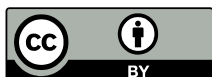

Supplement: s1 [file s1]
